# Supplementary material
Source: publisher site journal article supplement (https://kjim.org/upload/media/kjim-2025-058-Supplementary-Table-3.pdf)
Supplement: Supplementary file 1 [file kjim-2025-058-Supplementary-Table-3.pdf]

**Supplementary Table 3. Patient characteristics by post-extubation respiratory support**

| Variable                                              | Post-extubation<br>respiratory support<br>(N = 319) | Without post-extubation<br>respiratory support<br>(N = 287) | p value |
|-------------------------------------------------------|-----------------------------------------------------|-------------------------------------------------------------|---------|
| At the day of ICU admission                           |                                                     |                                                             |         |
| Age (y)                                               | 69.8 [60.7–76.7]                                    | 70.3 [60.0–77.7]                                            | 0.74    |
| Sex, male                                             | 196 (61.4)                                          | 177 (61.7)                                                  | > 0.99  |
| Body mass index (kg/m <sup>2</sup> )                  | 22.1 [19.8–24.7]                                    | 22.6 [19.8–25.4]                                            | 0.23    |
| SOFA score                                            | 8 [5–11]                                            | 8 [6–11]                                                    | 0.02    |
| Primary reason for intubation                         |                                                     |                                                             | < 0.001 |
| Acute respiratory failure                             | 257 (80.6)                                          | 181 (63.1)                                                  |         |
| Coma or seizure                                       | 23 (7.2)                                            | 47 (16.4)                                                   |         |
| Shock                                                 | 9 (2.8)                                             | 22 (7.7)                                                    |         |
| Cardiac arrest                                        | 1 (0.3)                                             | 3 (1.0)                                                     |         |
| Surgery                                               | 10 (3.1)                                            | 18 (6.3)                                                    |         |
| Others                                                | 19 (6.0)                                            | 16 (5.6)                                                    |         |
| At the day of extubation                              |                                                     |                                                             |         |
| SOFA score                                            | 5.0 [3.0–8.0]                                       | 6.0 [3.0–8.0]                                               | 0.48    |
| Duration of mechanical ventilation, days              | 4.0 [2.7–6.6]                                       | 3.3 [2.1–5.7]                                               | 0.003   |
| Richmond Agitation-Sedation Scale                     | 0.0 [-1.0 to 0.0]                                   | 0.0 [-1.0 to 0.0]                                           | 0.73    |
| Use of vasopressors                                   | 87 (27.3)                                           | 56 (19.5)                                                   | 0.03    |
| Ventilator settings before the extubation             |                                                     |                                                             | < 0.001 |
| Assist-control ventilation                            | 9 (2.8)                                             | 6 (2.1)                                                     |         |
| Pressure-support ventilation                          | 67 (21.0)                                           | 115 (40.1)                                                  |         |
| Continuous positive airway pressure                   | 243 (76.2)                                          | 166 (57.8)                                                  |         |
| Pressure-support level (cmH <sub>2</sub> O)           | 5.0 [4.0–7.0]                                       | 5.0 [0.0–6.0]                                               | < 0.001 |
| Positive end-expiratory pressure (cmH <sub>2</sub> O) | 5.0 [5.0–6.0]                                       | 5.0 [5.0–5.0]                                               | 0.001   |
| Tidal volume                                          |                                                     |                                                             |         |
| mL                                                    | 448 [352–555]                                       | 424 [336–520]                                               | 0.09    |
| mL/kg                                                 | 7.9 [6.2–9.5]                                       | 7.6 [6.1–9.4]                                               | 0.22    |
| Respiratory rate (per min)                            | 18 [15–22]                                          | 18 [14–23]                                                  | 0.62    |
| FiO <sub>2</sub>                                      | 0.3 [0.3–0.4]                                       | 0.3 [0.2–0.3]                                               | < 0.001 |
| PaO <sub>2</sub> /FiO <sub>2</sub>                    | 274.8 [217.1–342.9]                                 | 318.8 [253.6–383.1]                                         | < 0.001 |
| pH                                                    | 7.5 [7.4–7.5]                                       | 7.4 [7.4–7.5]                                               | 0.02    |
| PaCO <sub>2</sub> (mmHg)                              | 37.6 [33.5–42.0]                                    | 35.9 [32.2–40.6]                                            | 0.02    |
| Hypercapnia (PaCO <sub>2</sub> > 45 mmHg)             | 50 (15.7)                                           | 32 (11.1)                                                   | 0.13    |
| Bicarbonate (mmol/L)                                  | 26.7 [24.4–29.4]                                    | 25.4 [23.4–27.8]                                            | < 0.001 |
| Lactate (mmol/L)                                      | 1.5 [1.1–2.3]                                       | 1.5 [1.1–2.2]                                               | 0.95    |
| At the day of extubation                              |                                                     |                                                             |         |
| RSBI                                                  | 45.0 [31.0–65.0]                                    | 48.0 [33.0–65.5]                                            | 0.38    |
| HACOR score                                           | 2.0 [0.0–2.0]                                       | 0.0 [0.0–2.0]                                               | 0.04    |
| ROX index                                             | 16.8 [12.5–21.6]                                    | 17.8 [14.0–23.8]                                            | 0.01    |
| mROX                                                  | 15.8 [11.2–21.1]                                    | 17.2 [12.9–23.4]                                            | 0.003   |

**Supplementary Table 3. Continued**

| Variable                         | Post-extubation<br>respiratory support<br>(N = 319) | Without post-extubation<br>respiratory support<br>(N = 287) | <i>p</i> value |
|----------------------------------|-----------------------------------------------------|-------------------------------------------------------------|----------------|
| Outcome                          |                                                     |                                                             |                |
| Extubation failure within 7 days | 91 (28.5)                                           | 69 (24.0)                                                   | 0.25           |
| ICU mortality                    | 32 (10.0)                                           | 32 (11.1)                                                   | 0.75           |
| In-hospital mortality            | 110 (34.5)                                          | 105 (36.6)                                                  | 0.67           |
| ICU length of stay (d)           | 3.1 [1.2–8.0]                                       | 2.3 [1.1–5.1]                                               | 0.002          |
| Hospital length of stay (d)      | 19.9 [10.9–40.8]                                    | 25.9 [14.0–49.1]                                            | 0.03           |

Values are presented as median [interquartile range] or frequency (%) as appropriate.

ICU, intensive care unit; SOFA, sequential organ failure assessment; FiO<sub>2</sub>, fraction of inspired oxygen; PaO<sub>2</sub>, partial arterial oxygen pressure; RSBI, rapid shallow breathing index; HACOR, heart rate, acidosis, consciousness, oxygenation, and respiratory rate; ROX index, ratio of oxygen saturation/FiO<sub>2</sub> to respiratory rate; mROX, modified ROX index (ratio of PaO<sub>2</sub>/FiO<sub>2</sub> to respiratory rate).
